# Supplementary material for: Effect of a Multispecies Probiotic Mixture on the Growth and Incidence of Diarrhea, Immune Function, and Fecal Microbiota of Pre-weaning Dairy Calves
Source: PubMed Central journal article supplement (PMC8318002; doi:10.3389/fmicb.2021.681014), 2021-07-14
Supplement: Data_Sheet_1.pdf [file Data_Sheet_1.pdf]

**Effect of a Multispecies Probiotic Mixture on the growth and incidence of diarrhea, immune function, and fecal microbiota of pre-weaning dairy calves**

**Yanyan Wu<sup>1</sup>, Lili Wang<sup>2</sup>, Ruiqing Luo<sup>3</sup>, Hongli Chen<sup>3</sup>, Cunxi Nie<sup>1</sup>, Junli Niu<sup>1</sup>, Cheng Chen<sup>1</sup>, Yongping Xu<sup>2</sup>, Xiaoyu Li<sup>2</sup>, Wenju Zhang<sup>\*1</sup>**

<sup>1</sup>College of Animal Science & Technology, Shihezi University, Shihezi, 832003, China;

<sup>2</sup>School of Bioengineering, Dalian University of Technology, Dalian, 116024, China

<sup>3</sup>Xinjiang Tianshan Junken Animal Husbandry Co., Ltd. Shihezi , 832003, China

<sup>\*1</sup>Corresponding author: Wenjun Zhang, College of Animal Science & Technology, Shihezi University, North 4th Road, Shihezi, 832003, China

(E-mail: [zhangwj1022@sina.com](mailto:zhangwj1022@sina.com))

**Supplementary material**

Supplementary Table 1. Taxonomic analysis of the principal fecal phyla in Holstein dairy calves, classified according to multispecies probiotics and time point

| Phylum (%)            | Treatment (Trt) <sup>1</sup> |                     |                    |                     | SEM <sup>2</sup> | <i>P</i> -value |      |          |        |        |        |
|-----------------------|------------------------------|---------------------|--------------------|---------------------|------------------|-----------------|------|----------|--------|--------|--------|
|                       | C                            | T1                  | T2                 | T3                  |                  | Trt             | Time | Trt×Time | C×T1   | C×T2   | C×T3   |
| <b>Bacteria</b>       |                              |                     |                    |                     |                  |                 |      |          |        |        |        |
| <i>Firmicutes</i>     |                              |                     |                    |                     |                  |                 |      |          |        |        |        |
| WK2                   | 73.29                        | 69.70               | 61.45              | 71.45               | 4.99             | 0.45            | 0.24 | 0.08     | 0.82   | 0.46   | 0.91   |
| WK4                   | 79.24                        | 71.71               | 61.00              | 76.87               | 3.23             |                 |      |          | 0.39   | 0.05   | 0.78   |
| WK6                   | 63.24                        | 74.36               | 63.89              | 59.97               | 3.90             |                 |      |          | 0.35   | 0.96   | 0.78   |
| WK8                   | 49.73 <sup>b</sup>           | 78.68 <sup>a</sup>  | 76.31 <sup>a</sup> | 90.52 <sup>a</sup>  | 4.40             |                 |      |          | < 0.01 | < 0.01 | < 0.01 |
| <i>Bacteroidetes</i>  |                              |                     |                    |                     |                  |                 |      |          |        |        |        |
| WK2                   | 17.23                        | 17.06               | 8.90               | 17.86               | 4.09             | 0.36            | 0.31 | <0.01    | 0.99   | 0.52   | 0.96   |
| WK4                   | 10.51 <sup>b</sup>           | 13.21 <sup>ab</sup> | 28.24 <sup>a</sup> | 18.11 <sup>ab</sup> | 2.50             |                 |      |          | 0.65   | 0.01   | 0.22   |
| WK6                   | 19.37                        | 18.64               | 27.52              | 29.15               | 3.54             |                 |      |          | 0.95   | 0.45   | 0.37   |
| WK8                   | 45.42 <sup>a</sup>           | 15.51 <sup>b</sup>  | 17.16 <sup>b</sup> | 0.21 <sup>c</sup>   | 4.59             |                 |      |          | < 0.01 | < 0.01 | < 0.01 |
| <i>Actinobacteria</i> |                              |                     |                    |                     |                  |                 |      |          |        |        |        |
| WK2                   | 13.43                        | 11.27               | 29.09              | 5.87                | 0.35             | 0.64            | 0.06 | 0.29     | 0.87   | 0.25   | 0.57   |
| WK4                   | 8.26                         | 12.61               | 8.86               | 3.56                | 2.29             |                 |      |          | 0.53   | 0.93   | 0.50   |

|                        |       |      |      |      |      |        |        |        |       |       |       |
|------------------------|-------|------|------|------|------|--------|--------|--------|-------|-------|-------|
| WK6                    | 14.27 | 5.00 | 4.91 | 5.85 | 2.35 |        |        |        | 0.19  | 0.19  | 0.24  |
| WK8                    | 1.01  | 2.59 | 2.29 | 8.99 | 1.47 |        |        |        | 0.69  | 0.75  | 0.06  |
| <i>Proteobacteria</i>  |       |      |      |      |      |        |        |        |       |       |       |
| WK2                    | 0.48  | 1.69 | 0.19 | 2.05 | 0.54 | 0.20   | 0.25   | 0.26   | 0.46  | 0.86  | 0.35  |
| WK4                    | 0.34  | 0.04 | 0.15 | 3.78 | 0.89 |        |        |        | 0.90  | 0.95  | 0.21  |
| WK6                    | 0.09  | 0.15 | 0.18 | 0.08 | 0.01 |        |        |        | 0.23  | 0.09  | 0.84  |
| WK8                    | 0.18  | 0.10 | 0.16 | 0.10 | 0.02 |        |        |        | 0.30  | 0.80  | 0.32  |
| <i>Fusobacteria</i>    |       |      |      |      |      |        |        |        |       |       |       |
| WK2                    | 0.05  | 0.02 | 0.61 | 0.07 | 0.15 | < 0.01 | < 0.01 | < 0.01 | 0.96  | 0.18  | 0.88  |
| WK4                    | 0.00  | 0.00 | 0.00 | 0.00 | 0.00 |        |        |        | 1     | 1     | 1     |
| WK6                    | 0.00  | 0.00 | 0.00 | 0.00 | 0.00 |        |        |        | 1     | 1     | 1     |
| WK8                    | 0.00  | 0.00 | 0.00 | 0.00 | 0.00 |        |        |        | 1     | 1     | 1     |
| <i>Tenericutes</i>     |       |      |      |      |      |        |        |        |       |       |       |
| WK2                    |       |      |      |      |      | 0.54   | 0.60   | 0.37   |       |       |       |
| WK4                    | 0.38  | 1.29 | 0.91 | 0.73 | 0.19 |        |        |        | 0.137 | 0.372 | 0.548 |
| WK6                    | 1.66  | 0.83 | 0.82 | 1.14 | 0.28 |        |        |        | 0.346 | 0.336 | 0.55  |
| WK8                    | 1.46  | 1.37 | 3.18 | 0.23 | 0.61 |        |        |        | 0.959 | 0.312 | 0.495 |
| <i>Patescibacteria</i> |       |      |      |      |      |        |        |        |       |       |       |
| WK2                    |       |      |      |      |      |        |        |        |       |       |       |
| WK4                    | 1.14  | 0.25 | 0.20 | 0.12 | 0.19 | 0.47   | 0.65   | 0.08   |       |       |       |
| WK6                    | 0.37  | 0.02 | 0.09 | 0.43 | 0.12 |        |        |        | 0.39  | 0.484 | 0.879 |
| WK8                    | 0.02  | 0.62 | 0.33 | 0.00 | 0.12 |        |        |        | 0.094 | 0.361 | 0.95  |
| Fungi                  |       |      |      |      |      |        |        |        |       |       |       |
| <i>Ascomycota</i>      |       |      |      |      |      |        |        |        |       |       |       |

|                              |       |       |       |       |      |      |      |      |      |      |      |
|------------------------------|-------|-------|-------|-------|------|------|------|------|------|------|------|
| WK2                          | 61.67 | 97.06 | 84.77 | 57.81 | 8.58 | 0.69 | 0.06 | 0.19 | 0.16 | 0.35 | 0.87 |
| WK4                          | 92.35 | 91.52 | 94.07 | 93.14 | 1.33 |      |      |      | 0.84 | 0.68 | 0.86 |
| WK6                          | 96.54 | 70.43 | 91.35 | 91.25 | 5.25 |      |      |      | 0.10 | 0.73 | 0.72 |
| WK8                          | 96.09 | 91.30 | 95.48 | 88.12 | 1.24 |      |      |      | 0.12 | 0.84 | 0.02 |
| <i>Basidiomycota</i>         |       |       |       |       |      |      |      |      |      |      |      |
| WK2                          | 4.89  | 2.88  | 13.62 | 41.54 | 6.90 | 0.07 | 0.10 | 0.14 | 0.91 | 0.63 | 0.06 |
| WK4                          | 5.33  | 5.05  | 5.16  | 6.72  | 0.86 |      |      |      | 0.92 | 0.95 | 0.63 |
| WK6                          | 3.00  | 5.42  | 8.33  | 6.59  | 1.32 |      |      |      | 0.54 | 0.19 | 0.37 |
| WK8                          | 3.56  | 8.25  | 4.06  | 9.61  | 1.11 |      |      |      | 0.12 | 0.86 | 0.05 |
| unclassified_k__Fungi        |       |       |       |       |      |      |      |      |      |      |      |
| WK2                          | 0.48  | 0.00  | 1.61  | 0.13  | 0.41 | 0.46 | 0.44 | 0.38 | 0.69 | 0.36 | 0.77 |
| WK4                          | 2.32  | 0.34  | 0.61  | 0.11  | 0.57 |      |      |      | 0.26 | 0.32 | 0.21 |
| WK6                          | 0.47  | 22.50 | 0.28  | 0.33  | 5.43 |      |      |      | 0.18 | 0.99 | 0.99 |
| WK8                          | 0.34  | 0.40  | 0.41  | 1.81  | 0.24 |      |      |      | 0.92 | 0.91 | 0.02 |
| <i>Neocallimastigomycota</i> |       |       |       |       |      |      |      |      |      |      |      |
| WK2                          | 7.96  | 0.00  | 0.00  | 0.01  | 1.99 | 0.49 | 0.49 | 0.41 | 0.18 | 0.18 | 0.18 |
| WK4                          | 0.00  | 2.23  | 0.00  | 0.00  | 0.56 |      |      |      | 0.18 | 1.00 | 1.00 |
| WK6                          | 0.00  | 0.00  | 0.00  | 0.00  | 0.00 |      |      |      | 0.00 | 0.00 | 0.00 |
| WK8                          | 0.00  | 0.00  | 0.00  | 0.00  | 0.00 |      |      |      | 0.00 | 0.00 | 0.00 |

<sup>a-b</sup> The values in the same row with different superscripts are significantly different ( $P < 0.05$ ), while values with the same or no superscripts mean no significant difference ( $P > 0.05$ ).

<sup>1</sup>Treatments: C = no supplementation (control); T1 = 0.5 g/calf/day; T2 = 1 g/calf/day; T3 = 2 g/calf/day.

<sup>2</sup>SEM = Standard error of mean.

Supplementary Table 2. Taxonomic analysis of the principal fecal genera in Holstein dairy calves, classified according to multispecies probiotics and time point

| Genus (%)              | Treatment (Trt) <sup>1</sup> |         |         |         | SEM <sup>2</sup> | <i>P</i> -value |       |          |       |       |       |
|------------------------|------------------------------|---------|---------|---------|------------------|-----------------|-------|----------|-------|-------|-------|
|                        | C                            | T1      | T2      | T3      |                  | Trt             | Time  | Trt×Time | C×T1  | C×T2  | C×T3  |
| <i>Bacteria</i>        |                              |         |         |         |                  |                 |       |          |       |       |       |
| <i>Blautia</i>         |                              |         |         |         |                  |                 |       |          |       |       |       |
| WK2                    | 4.275                        | 4.5633  | 10.4275 | 11.0475 | 3.06             | 0.38            | 0.03  | 0.84     | 0.977 | 0.513 | 0.472 |
| WK4                    | 17.1725                      | 22.6225 | 21.37   | 22.2125 | 2.52             |                 |       |          | 0.896 | 0.948 | 0.915 |
| WK6                    | 11.435                       | 16.7625 | 7.7875  | 14.725  | 2.26             |                 |       |          | 0.436 | 0.591 | 0.628 |
| WK8                    | 15.7375                      | 27.765  | 6.87    | 20.7375 | 4.18             |                 |       |          | 0.324 | 0.463 | 0.677 |
| <i>Collinsella</i>     |                              |         |         |         |                  |                 |       |          |       |       |       |
| WK2                    | 11.535                       | 4.9725  | 7.4925  | 4.975   | 1.93             | 0.53            | <0.01 | 0.79     | 0.272 | 0.492 | 0.273 |
| WK4                    | 0                            | 0.64    | 0.71    | 0       | 0.23             |                 |       |          | 0.781 | 0.724 | 1     |
| WK6                    | 2.775                        | 0       | 0       | 0.5175  | 0.69             |                 |       |          | 0.19  | 0.19  | 0.28  |
| WK8                    | 0.0375                       | 0.105   | 0       | 1.7175  | 0.42             |                 |       |          | 0.957 | 0.976 | 0.193 |
| <i>Bacteroides</i>     |                              |         |         |         |                  |                 |       |          |       |       |       |
| WK2                    | 7.6875                       | 5.585   | 5.3875  | 9.6325  | 2.17             | 0.79            | 0.05  | 0.89     | 0.76  | 0.738 | 0.777 |
| WK4                    | 1.8275                       | 2.6725  | 2.6775  | 5.4475  | 0.79             |                 |       |          | 0.981 | 0.981 | 0.407 |
| WK6                    | 2.775                        | 5.5925  | 2.75    | 4.095   | 0.85             |                 |       |          | 0.285 | 0.992 | 0.61  |
| WK8                    | 0.7625                       | 0       | 4.8275  | 1.03    | 0.74             |                 |       |          | 0.677 | 0.042 | 0.883 |
| <i>Bifidobacterium</i> |                              |         |         |         |                  |                 |       |          |       |       |       |
| WK2                    | 0.1                          | 0.4     | 0.51    | 20.39   | 4.64             | 0.65            | 0.2   | 0.47     | 0.982 | 0.141 | 0.05  |

|                         |        |        |        |        |      |      |       |      |       |       |       |
|-------------------------|--------|--------|--------|--------|------|------|-------|------|-------|-------|-------|
| WK4                     | 1.2775 | 0      | 0      | 9.2175 | 2.3  |      |       |      | 0.997 | 0.634 | 0.997 |
| WK6                     | 0.485  | 0      | 8.7475 | 0      | 2.18 |      |       |      | 0.939 | 0.939 | 0.207 |
| WK8                     | 0.0725 | 0.2275 | 0      | 1.2525 |      |      |       |      | 0.788 | 0.75  | 0.9   |
| <i>Faecalibacterium</i> |        |        |        |        |      |      |       |      |       |       |       |
| WK2                     | 3.79   | 0.8075 | 13.92  | 3.18   | 0.12 | 0.23 | 0.81  | 0.76 | 0.987 | 0.178 | 3.79  |
| WK4                     | 1.635  | 0.4775 | 3.2725 | 0.83   |      |      |       |      | 0.997 | 0.554 | 1.635 |
| WK6                     | 0      | 0      | 1.15   | 0.22   |      |      |       |      | 1     | 0.031 | 0     |
| WK8                     | 0      | 0      | 2.9575 | 0.73   |      |      |       |      | 1     | 0.183 | 0     |
| <i>Lactobacillus</i>    |        |        |        |        |      |      |       |      |       |       |       |
| WK2                     | 3.4225 | 2.5875 | 9.1125 | 2.48   | 1.7  | 0.51 | <0.01 | 0.56 | 0.868 | 0.268 | 0.851 |
| WK4                     | 2.855  | 0      | 0      | 0      | 0.35 |      |       |      | 0.515 | 0.515 | 0.515 |
| WK6                     | 0      | 0      | 0      | 0      |      |      |       |      |       |       |       |
| WK8                     | 0      | 0      | 0      | 0      |      |      |       |      |       |       |       |
| <i>Subdoligranulum</i>  |        |        |        |        |      |      |       |      |       |       |       |
| WK2                     | 5.725  | 2.6075 | 8.79   | 0.225  | 2.48 | 0.67 | 0.15  | 0.95 | 0.681 | 0.686 | 0.471 |
| WK4                     | 0      | 1.1125 | 0      | 0.765  | 0.32 |      |       |      | 0.659 | 1     | 0.853 |
| WK6                     | 0      | 0      | 0      | 0      | 0    |      |       |      | 0.906 | 0.672 | 0.38  |
| WK8                     | 9.4    | 8.245  | 5.2375 | 0.6575 | 3.15 |      |       |      |       |       |       |
| <i>Tyzzarella</i>       |        |        |        |        |      |      |       |      |       |       |       |
| WK2                     | 4.5425 | 7.145  | 0.28   | 4.25   | 1.92 | 0.59 | 0.06  | 0.86 | 0.659 | 0.474 | 0.96  |
| WK4                     | 0      | 1.0525 | 0      | 0      | 0.17 |      |       |      | 0.121 | 1     | 1     |
| WK6                     | 0.9175 | 0      | 0      | 2.915  | 0.74 |      |       |      | 0.679 | 0.679 | 0.374 |
| WK8                     | 0.3775 | 0.715  | 0.44   | 0      | 0.21 |      |       |      | 0.614 | 0.925 | 0.573 |
| <i>Butyricicoccus</i>   |        |        |        |        |      |      |       |      |       |       |       |

|                                |        |        |        |        |      |       |       |       |       |       |       |
|--------------------------------|--------|--------|--------|--------|------|-------|-------|-------|-------|-------|-------|
| WK2                            | 4.78   | 7.3975 | 1.76   | 1.735  | 1.83 | 0.62  | 0.01  | 0.85  | 0.632 | 0.609 | 0.578 |
| WK4                            | 0.00   | 0.00   | 0.00   | 0.00   |      |       |       |       | 1.00  | 1.00  | 1.00  |
| WK6                            | 0.00   | 0.00   | 0.00   | 0.00   |      |       |       |       | 1.00  | 1.00  | 1.00  |
| WK8                            | 0.0725 | 0.3275 | 0      | 0.1475 | 0.08 |       |       |       | 0.344 | 0.784 | 0.777 |
| <i>Ruminococcus-2</i>          |        |        |        |        |      |       |       |       |       |       |       |
| WK2                            | 0      | 3.6325 | 0.425  | 0.325  | 0.25 | 0.33  | 0.24  | 0.63  | 0.084 | 0.83  | 0.869 |
| WK4                            | 1.2175 | 3.7625 | 4.045  | 0      | 0.79 |       |       |       | 0.623 | 0.544 | 0.934 |
| WK6                            | 0      | 1.6225 | 0      | 0.6675 | 0.42 |       |       |       | 0.215 | 1     | 0.6   |
| WK8                            | 0      | 1.095  | 2.12   | 0.2125 | 0.54 |       |       |       | 0.499 | 0.202 | 0.895 |
| <i>Dorea</i>                   |        |        |        |        |      |       |       |       |       |       |       |
| WK2                            | 2.15   | 3.565  | 3.1075 | 1.8725 | 1.1  | 0.96  | <0.01 | 0.99  | 0.689 | 0.786 | 0.937 |
| WK4                            | 0      | 0      | 0      | 0      |      |       |       |       | 1.00  | 1.00  | 1.00  |
| WK6                            | 0      | 0      | 0      | 0      |      |       |       |       | 1.00  | 1.00  | 1.00  |
| WK8                            | 0.52   | 0.3575 | 0.34   | 0.215  | 0.16 |       |       |       | 0.764 | 0.74  | 0.575 |
| <i>Ruminococcaceae_UCG005</i>  |        |        |        |        |      |       |       |       |       |       |       |
| WK2                            | 0.00   | 0.00   | 0.00   | 0.00   | 0.00 | 0.27  | <0.01 | <0.01 | 0.00  | 0.00  | 0.00  |
| WK4                            | 7.54   | 7.12   | 7.89   | 9.48   | 1.10 |       |       |       | 0.91  | 0.92  | 0.58  |
| WK6                            | 10.43  | 5.40   | 2.34   | 12.02  | 1.73 |       |       |       | 0.28  | 0.10  | 0.73  |
| WK8                            | 9.07   | 21.01  | 19.91  | 0.00   | 2.38 |       |       |       | 0.00  | 0.00  | 0.01  |
| <i>norank_f_Muribaculaceae</i> |        |        |        |        |      |       |       |       |       |       |       |
| WK2                            | 2.97   | 0.01   | 0.00   | 2.37   | 0.62 | <0.01 | <0.01 | <0.01 | 0.10  | 0.10  | 0.72  |
| WK4                            | 4.79   | 4.58   | 5.59   | 2.28   | 0.92 |       |       |       | 0.94  | 0.78  | 0.38  |
| WK6                            | 14.24  | 2.12   | 0.72   | 6.59   | 1.97 |       |       |       | 0.02  | 0.01  | 0.11  |
| WK8                            | 15.86  | 5.95   | 7.05   | 0.01   | 1.63 |       |       |       | 0.00  | 0.00  | 0.00  |

|                                     |       |       |      |       |      |       |       |       |      |       |      |
|-------------------------------------|-------|-------|------|-------|------|-------|-------|-------|------|-------|------|
| <i>Ruminococcaceae_UCG-014</i>      |       |       |      |       |      |       |       |       |      |       |      |
| WK2                                 | 1.46  | 0.00  | 1.87 | 11.37 | 1.75 | 0.58  | 0.21  | 0.02  | 0.73 | 0.92  | 0.03 |
| WK4                                 | 6.74  | 5.53  | 6.60 | 6.73  | 0.84 |       |       |       | 0.66 | 0.96  | 1.00 |
| WK6                                 | 7.38  | 7.57  | 1.81 | 5.25  | 1.05 |       |       |       | 0.95 | 0.06  | 0.45 |
| WK8                                 | 4.84  | 4.79  | 5.03 | 0.23  | 0.96 |       |       |       | 0.99 | 0.94  | 0.10 |
| <i>Rikenellaceae_RC9_gut_group</i>  |       |       |      |       |      |       |       |       |      |       |      |
| WK2                                 | 0.16  | 0.01  | 0.00 | 1.55  | 0.39 | <0.01 | <0.01 | <0.01 | 0.89 | 0.889 | 0.23 |
| WK4                                 | 5.99  | 9.87  | 3.46 | 1.31  | 1.72 |       |       |       | 0.43 | 0.61  | 0.35 |
| WK6                                 | 4.45  | 5.91  | 0.00 | 8.75  | 1.25 |       |       |       | 0.64 | 0.16  | 0.18 |
| WK8                                 | 21.59 | 3.15  | 3.62 | 0.00  | 2.30 |       |       |       | 0.00 | 0.00  | 0.00 |
| <i>Peptostreptococcus</i>           |       |       |      |       |      |       |       |       |      |       |      |
| WK2                                 | 0.07  | 32.31 | 0.07 | 0.00  | 4.16 | <0.01 | <0.01 | <0.01 | 0.00 | 1.00  | 0.99 |
| WK4                                 | 0.00  | 0.00  | 0.00 | 1.39  | 0.35 |       |       |       | 1.00 | 1.00  | 0.18 |
| WK6                                 | 0.00  | 0.00  | 0.00 | 0.00  | 0.00 |       |       |       | 1    | 1     | 1    |
| WK8                                 | 0.00  | 0.00  | 0.00 | 10.41 | 1.45 |       |       |       | 1.00 | 1.00  | 1    |
| <i>[Ruminococcus]_gavreaii_grou</i> |       |       |      |       |      |       |       |       |      |       |      |
| <i>p</i>                            |       |       |      |       |      |       |       |       |      |       |      |
| WK2                                 | 1.54  | 0.02  | 0.27 | 1.60  | 0.39 | 0.47  | <0.01 | <0.01 | 0.18 | 0.26  | 0.95 |
| WK4                                 | 4.76  | 2.44  | 4.07 | 6.70  | 0.87 |       |       |       | 0.36 | 0.78  | 0.44 |
| WK6                                 | 0.36  | 4.33  | 5.44 | 1.76  | 0.68 |       |       |       | 0.01 | 0.00  | 0.32 |
| WK8                                 | 0.00  | 0.49  | 0.46 | 0.78  | 0.23 |       |       |       | 0.49 | 0.52  | 0.28 |
| <i>Olsenella</i>                    |       |       |      |       |      |       |       |       |      |       |      |
| WK2                                 | 0.00  | 0.93  | 0.85 | 0.28  | 0.27 | 0.19  | 0.28  | 0.14  | 0.26 | 0.30  | 0.72 |
| WK4                                 | 3.13  | 8.22  | 0.49 | 1.08  | 1.20 |       |       |       | 0.10 | 3.78  | 0.49 |



|                                        |      |      |       |      |      |      |      |      |      |      |      |
|----------------------------------------|------|------|-------|------|------|------|------|------|------|------|------|
| WK6                                    | 1.75 | 6.54 | 2.07  | 0.00 | 1.16 |      |      |      | 0.15 | 0.92 | 0.58 |
| WK8                                    | 0.00 | 0.00 | 0.79  | 5.69 | 1.42 |      |      |      | 1.00 | 0.85 | 0.19 |
| <i>[Eubacterium]_coprostanoligenes</i> |      |      |       |      |      |      |      |      |      |      |      |
| <i>_group</i>                          |      |      |       |      |      |      |      |      |      |      |      |
| WK2                                    | 0.00 | 0.01 | 0.00  | 0.70 | 0.17 | 0.67 | 0.29 | 0.62 | 0.99 | 1.00 | 0.17 |
| WK4                                    | 1.08 | 2.61 | 3.51  | 0.65 | 0.60 |      |      |      | 0.37 | 0.17 | 0.80 |
| WK6                                    | 0.49 | 0.57 | 0.00  | 3.75 | 0.47 |      |      |      | 0.93 | 0.58 | 0.00 |
| WK8                                    | 1.13 | 2.02 | 2.33  | 0.00 | 0.28 |      |      |      | 0.10 | 0.03 | 0.04 |
| <i>norank_f_Lachnospiraceae</i>        |      |      |       |      |      |      |      |      |      |      |      |
| WK2                                    | 3.11 | 0.53 | 13.31 | 0.32 | 3.22 | 0.43 | 0.27 | 0.53 | 0.78 | 0.29 | 0.77 |
| WK4                                    | 0.00 | 0.72 | 0.00  | 0.00 | 0.14 |      |      |      | 0.08 | 1.00 | 1.00 |
| WK6                                    | 0.00 | 2.99 | 1.92  | 0.00 | 0.60 |      |      |      | 0.08 | 0.25 | 1.00 |
| WK8                                    | 0.00 | 0.37 | 0.28  | 1.11 | 0.17 |      |      |      | 0.40 | 0.52 | 0.02 |
| <i>Romboutsia</i>                      |      |      |       |      |      |      |      |      |      |      |      |
| WK2                                    | 0.00 | 0.00 | 0.00  | 2.30 | 0.44 |      |      |      | 1.00 | 1.00 | 0.06 |
| WK4                                    | 0.00 | 4.63 | 4.61  | 5.96 | 1.61 |      |      |      | 0.35 | 0.35 | 0.23 |
| WK6                                    | 0.00 | 0.00 | 0.84  | 2.49 | 0.46 |      |      |      | 1.00 | 0.49 | 0.06 |
| WK8                                    | 0.00 | 2.37 | 1.93  | 0.00 | 0.74 |      |      |      | 0.30 | 0.39 | 1.00 |
| <i>Ruminococcaceae_UCG-013</i>         |      |      |       |      |      |      |      |      |      |      |      |
| WK2                                    | 0.00 | 0.00 | 0.00  | 0.00 | 0.00 |      |      |      | 0.00 | 0.00 | 0.00 |
| WK4                                    | 1.70 | 0.37 | 0.00  | 0.00 | 0.30 |      |      |      | 0.10 | 0.63 | 0.63 |
| WK6                                    | 7.34 | 1.05 | 0.00  | 0.95 | 1.38 |      |      |      | 0.11 | 0.07 | 0.11 |
| WK8                                    | 7.32 | 1.50 | 1.62  | 0.00 | 1.29 |      |      |      | 0.11 | 0.12 | 0.05 |
| <i>Fusobacterium</i>                   |      |      |       |      |      |      |      |      |      |      |      |
|                                        |      |      |       |      |      | 0.41 | 0.35 | 0.47 |      |      |      |

|                                     |                   |                   |                   |                    |      |      |      |      |      |      |      |
|-------------------------------------|-------------------|-------------------|-------------------|--------------------|------|------|------|------|------|------|------|
| WK2                                 | 0.00              | 14.40             | 0.77              | 0.00               | 3.57 |      |      |      | 0.18 | 0.94 | 1.00 |
| WK4                                 | 0.00              | 0.00              | 0.00              | 0.00               | 0.00 |      |      |      | 1.00 | 1.00 | 1.00 |
| WK6                                 | 0.00              | 0.00              | 0.00              | 0.00               | 0.00 |      |      |      | 1.00 | 1.00 | 1.00 |
| WK8                                 | 0.00              | 0.00              | 0.00              | 0.00               | 0.00 |      |      |      | 1.00 | 1.00 | 1.00 |
| <i>[Ruminococcus]-torques-group</i> |                   |                   |                   |                    |      |      |      |      |      |      |      |
| WK2                                 | 1.81              | 8.39              | 1.39              | 1.50               | 2.08 | 0.43 | 0.31 | 0.36 | 0.30 | 0.95 | 0.96 |
| WK4                                 | 0.00              | 0.00              | 0.00              | 0.00               | 0.00 |      |      |      | 1.00 | 1.00 | 1.00 |
| WK6                                 | 0.00              | 1.33              | 6.48              | 0.00               | 1.61 |      |      |      | 0.78 | 0.19 | 1.00 |
| WK8                                 | 0.00              | 0.00              | 0.00              | 1.01               | 0.14 |      |      |      | 1.00 | 1.00 | 0.00 |
| Fungi                               |                   |                   |                   |                    |      |      |      |      |      |      |      |
| <i>Aspergillus</i>                  |                   |                   |                   |                    |      |      |      |      |      |      |      |
| WK2                                 | 1.49              | 45.93             | 13.75             | 37.66              | 6.60 | 0.39 | 0.01 | 0.91 | 0.01 | 0.43 | 0.03 |
| WK4                                 | 54.17             | 65.28             | 20.32             | 50.05              | 5.05 |      |      |      | 0.21 | 0.00 | 0.63 |
| WK6                                 | 44.27             | 47.72             | 30.49             | 74.38              | 6.82 |      |      |      | 0.84 | 0.44 | 0.11 |
| WK8                                 | 52.00             | 62.77             | 59.47             | 26.36              | 4.47 |      |      |      | 0.20 | 0.37 | 0.01 |
| <i>Thermomyces</i>                  |                   |                   |                   |                    |      |      |      |      |      |      |      |
| WK2                                 | 0.00              | 18.06             | 5.03              | 12.48              | 4.92 | 0.38 | 0.61 | 0.18 | 0.24 | 0.74 | 0.41 |
| WK4                                 | 1.18              | 0.67              | 4.77              | 4.04               | 0.80 |      |      |      | 0.81 | 0.11 | 0.20 |
| WK6                                 | 0.32              | 18.51             | 0.96              | 0.27               | 3.73 |      |      |      | 0.10 | 0.95 | 0.10 |
| WK8                                 | 5.53              | 0.01              | 0.03              | 16.78              | 2.82 |      |      |      | 0.44 | 0.45 | 0.13 |
| <i>Saccharomyces</i>                |                   |                   |                   |                    |      |      |      |      |      |      |      |
| WK2                                 | 0.00 <sup>b</sup> | 1.59 <sup>b</sup> | 4.73 <sup>b</sup> | 15.19 <sup>a</sup> | 3.18 | 0.24 | 0.74 | 0.24 | 0.86 | 0.60 | 0.01 |
| WK4                                 | 0.00              | 5.30              | 8.30              | 3.07               | 1.96 |      |      |      | 0.37 | 0.17 | 0.60 |
| WK6                                 | 0.00              | 4.76              | 4.72              | 0.68               | 1.11 |      |      |      | 0.14 | 0.14 | 0.83 |

|                            |       |      |       |       |      |      |      |      |      |      |      |
|----------------------------|-------|------|-------|-------|------|------|------|------|------|------|------|
| WK8                        | 0.00  | 2.49 | 6.60  | 18.26 | 4.44 |      |      |      | 0.85 | 0.62 | 0.18 |
| <i>Melanocarpus</i>        |       |      |       |       |      |      |      |      |      |      |      |
| WK2                        | 0.00  | 0.21 | 2.53  | 16.11 | 2.94 | 0.90 | 0.51 | 0.57 | 0.98 | 0.74 | 0.05 |
| WK4                        | 1.71  | 0.00 | 11.76 | 2.51  | 1.54 |      |      |      | 0.60 | 0.01 | 0.80 |
| WK6                        | 0.96  | 2.68 | 0.10  | 0.18  | 0.43 |      |      |      | 0.13 | 0.44 | 0.48 |
| WK8                        | 2.54  | 0.09 | 0.01  | 20.04 | 2.79 |      |      |      | 0.67 | 0.66 | 0.01 |
| <i>Cutaneotrichosporon</i> |       |      |       |       |      |      |      |      |      |      |      |
| WK2                        | 20.62 | 0.42 | 29.20 | 0.02  | 6.96 | 0.06 | 0.02 | 0.03 | 0.32 | 0.67 | 0.31 |
| WK4                        | 2.43  | 0.17 | 0.50  | 0.24  | 0.35 |      |      |      | 0.02 | 0.04 | 0.02 |
| WK6                        | 0.00  | 0.05 | 0.90  | 0.38  | 0.18 |      |      |      | 0.92 | 0.09 | 0.45 |
| WK8                        | 0.98  | 0.01 | 0.69  | 0.96  | 0.34 |      |      |      | 0.36 | 0.78 | 0.96 |
| <i>Pichia</i>              |       |      |       |       |      |      |      |      |      |      |      |
| WK2                        | 46.78 | 1.08 | 0.00  | 0.00  | 7.99 | 0.49 | 0.13 | 0.73 | 0.04 | 0.03 | 0.03 |
| WK4                        | 0.00  | 3.37 | 0.47  | 0.02  | 0.84 |      |      |      | 0.19 | 0.85 | 0.99 |
| WK6                        | 0.00  | 0.00 | 0.00  | 0.00  | 0.00 |      |      |      | 0.00 | 0.00 | 0.00 |
| WK8                        | 0.00  | 0.00 | 0.00  | 0.00  | 0.00 |      |      |      | 0.00 | 0.00 | 0.00 |
| <i>Wallemia</i>            |       |      |       |       |      |      |      |      |      |      |      |
| WK2                        | 0.00  | 2.10 | 3.21  | 4.74  | 0.92 | 0.28 | 0.78 | 0.89 | 0.44 | 0.21 | 0.08 |
| WK4                        | 0.55  | 2.46 | 5.21  | 1.00  | 0.64 |      |      |      | 0.19 | 0.01 | 0.75 |
| WK6                        | 0.29  | 1.51 | 4.42  | 2.18  | 0.90 |      |      |      | 0.64 | 0.16 | 0.47 |
| WK8                        | 2.36  | 1.51 | 1.54  | 0.51  | 0.31 |      |      |      | 0.33 | 0.35 | 0.05 |
| <i>Chrysosporium</i>       |       |      |       |       |      |      |      |      |      |      |      |
| WK2                        | 0.00  | 0.03 | 0.07  | 1.70  | 0.29 | 0.79 | 0.29 | 0.60 | 0.97 | 0.92 | 0.03 |
| WK4                        | 0.87  | 0.00 | 0.00  | 12.12 | 2.28 |      |      |      | 0.89 | 0.89 | 0.08 |

|                                       |      |      |      |      |      |      |       |      |      |      |      |
|---------------------------------------|------|------|------|------|------|------|-------|------|------|------|------|
| WK6                                   | 7.23 | 3.47 | 1.09 | 0.31 | 1.81 |      |       |      | 0.49 | 0.27 | 0.21 |
| WK8                                   | 0.00 | 0.00 | 0.00 | 0.00 | 0.00 |      |       |      | 0.00 | 0.00 | 0.00 |
| <i>Acrostalagmus</i>                  |      |      |      |      |      |      |       |      |      |      |      |
| WK2                                   | 2.31 | 7.47 | 0.79 | 1.13 | 1.78 | 0.05 | 0.50  | 0.71 | 0.34 | 0.77 | 0.82 |
| WK4                                   | 1.79 | 0.27 | 5.77 | 0.08 | 0.98 |      |       |      | 0.55 | 0.13 | 0.50 |
| WK6                                   | 5.05 | 1.36 | 0.18 | 0.00 | 1.26 |      |       |      | 0.33 | 0.20 | 0.19 |
| WK8                                   | 0.70 | 0.15 | 0.03 | 0.72 | 0.22 |      |       |      | 0.41 | 0.32 | 0.98 |
| <i>Microascus</i>                     |      |      |      |      |      |      |       |      |      |      |      |
| WK2                                   | 0.00 | 0.62 | 0.01 | 0.30 | 0.16 | 0.64 | <0.01 | 0.68 | 0.20 | 0.99 | 0.54 |
| WK4                                   | 0.00 | 0.38 | 0.00 | 0.49 | 0.09 |      |       |      | 0.09 | 1.00 | 0.03 |
| WK6                                   | 3.69 | 0.07 | 0.33 | 1.73 | 0.70 |      |       |      | 0.08 | 0.10 | 0.32 |
| WK8                                   | 2.89 | 5.26 | 2.67 | 0.33 | 0.77 |      |       |      | 0.26 | 0.92 | 0.22 |
| <i>Nigrospora</i>                     |      |      |      |      |      |      |       |      |      |      |      |
| WK2                                   | 0.00 | 0.47 | 0.47 | 0.90 | 0.21 | 0.04 | 0.23  | 0.20 | 0.45 | 0.45 | 0.16 |
| WK4                                   | 0.00 | 0.00 | 0.00 | 0.00 | 0.00 |      |       |      | 0.00 | 0.00 | 0.00 |
| WK6                                   | 3.27 | 0.97 | 0.97 | 0.24 | 0.81 |      |       |      | 0.35 | 0.35 | 0.23 |
| WK8                                   | 0.00 | 0.00 | 0.00 | 0.00 | 0.00 |      |       |      | 0.00 | 0.00 | 0.00 |
| <i>Kazachstania</i>                   |      |      |      |      |      |      |       |      |      |      |      |
| WK2                                   | 0.00 | 1.80 | 0.00 | 0.00 | 0.31 | 0.71 | 0.11  | 0.29 | 0.03 | 1.00 | 1.00 |
| WK4                                   | 0.04 | 0.00 | 0.00 | 0.29 | 0.07 |      |       |      | 0.84 | 0.84 | 0.26 |
| WK6                                   | 0.00 | 0.00 | 0.47 | 0.00 | 0.82 |      |       |      | 1.00 | 0.04 | 1.00 |
| WK8                                   | 0.00 | 0.00 | 0.00 | 0.00 | 0.00 |      |       |      | 0.00 | 0.00 | 0.00 |
| <i>unclassified_c_Sordariomycetes</i> |      |      |      |      |      |      |       |      |      |      |      |
| WK2                                   | 0.00 | 1.40 | 3.32 | 2.20 | 0.78 | 0.45 | 0.26  | 0.76 | 0.55 | 0.17 | 0.35 |

|                                            |       |       |       |      |      |      |      |      |       |       |       |
|--------------------------------------------|-------|-------|-------|------|------|------|------|------|-------|-------|-------|
| WK4                                        | 1.01  | 10.96 | 3.05  | 6.63 | 1.90 |      |      |      | 0.08  | 0.70  | 0.30  |
| WK6                                        | 10.48 | 1.60  | 2.64  | 2.88 | 1.47 |      |      |      | 0.03  | 0.05  | 0.06  |
| WK8                                        | 4.61  | 2.94  | 2.86  | 1.52 | 0.84 |      |      |      | 0.52  | 0.50  | 0.24  |
| <i>unclassified_f_Plectosphaerellaceae</i> |       |       |       |      |      |      |      |      |       |       |       |
| WK2                                        | 0.06  | 0.23  | 3.17  | 0.78 | 0.61 | 0.65 | 0.23 | 0.31 | 0.92  | 0.08  | 0.67  |
| WK4                                        | 0.17  | 2.09  | 0.00  | 2.31 | 0.54 |      |      |      | 0.22  | 0.91  | 0.18  |
| WK6                                        | 0.77  | 0.83  | 0.15  | 1.21 | 0.31 |      |      |      | 0.95  | 0.52  | 0.65  |
| WK8                                        | 9.34  | 4.27  | 5.10  | 0.20 | 1.72 |      |      |      | 0.31  | 0.39  | 0.08  |
| <i>unclassified_k_Fungi</i>                |       |       |       |      |      |      |      |      |       |       |       |
| WK2                                        | 0.25  | 3.25  | 0.38  | 0.93 | 1.02 | 0.80 | 0.02 | 0.63 | <0.01 | <0.01 | <0.01 |
| WK4                                        | 2.68  | 0.06  | 0.00  | 0.00 | 0.58 |      |      |      | 0.12  | 0.11  | 0.11  |
| WK6                                        | 0.48  | 0.70  | 22.05 | 0.21 | 5.43 |      |      |      | 0.99  | 0.19  | 0.99  |
| WK8                                        | 1.30  | 0.86  | 0.43  | 0.34 | 0.24 |      |      |      | 0.53  | 0.24  | 0.20  |
| <i>unclassified_f_Sporormiaceae</i>        |       |       |       |      |      |      |      |      |       |       |       |
| WK2                                        | 0.00  | 0.00  | 0.00  | 0.00 | 0.00 | 0.29 | 0.85 | 0.91 | 1     | 1     | 1     |
| WK4                                        | 9.51  | 0.23  | 0.41  | 2.22 | 1.63 |      |      |      | 0.05  | 0.05  | 0.10  |
| WK6                                        | 0.00  | 0.00  | 0.00  | 0.00 | 0.00 |      |      |      | 1     | 1     | 1     |
| WK8                                        | 3.39  | 0.83  | 1.22  | 0.01 | 0.85 |      |      |      | 0.33  | 0.40  | 0.20  |

<sup>a-b</sup> The values in the same row with different superscripts are significantly different ( $P < 0.05$ ), while values with the same or no superscripts mean no significant difference ( $P > 0.05$ ).

<sup>1</sup>Treatments: C = no supplementation (control); T1 = 0.5 g/calf/day; T2 = 1 g/calf/day; T3 = 2 g/calf/day.

<sup>2</sup>SEM = Standard error of mean.

T
